1  
2  
3  
4  
5  
6  
7  
8  
9  
10  
11  
12  
13  
14  
15  
16  
17  
18  
19  
20  
21  
22  
23  
24

**Frequent development of broadly neutralizing antibodies in early life in a large cohort of HIV-infected children**

Amanda Lucier<sup>1</sup>, Youyi Fong<sup>2</sup>, Shuk Hang Li<sup>1</sup>, Maria Dennis<sup>1</sup>, Joshua Eudailey<sup>1</sup>, Ashley Nelson<sup>1</sup>, Kevin Saunders<sup>1</sup>, Coleen K. Cunningham<sup>1,3</sup>, Elizabeth McFarland<sup>4</sup>, Ross McKinney<sup>1</sup>, M. Anthony Moody<sup>1</sup>, Celia LaBranche<sup>1</sup>, David Montefiori<sup>1</sup>, Sallie R. Permar<sup>1,5</sup>, and Genevieve G. Fouda<sup>1</sup>

<sup>1</sup>Duke University Medical Center, Durham, NC

<sup>2</sup>Statistical Center for HIV/AIDS Research and Prevention, Fred Hutchinson Cancer Research Center, Seattle, WA

<sup>3</sup>University of California, Irvine

<sup>4</sup>University of Colorado, Aurora, CO

<sup>5</sup>Weill Cornell School of Medicine

**Corresponding author:** Genevieve G. Fouda ([genevieve.fouda@duke.edu](mailto:genevieve.fouda@duke.edu))

25 **Abstract**

26 Recent studies conducted in small cohorts of children have indicated that broadly neutralizing  
27 antibodies (bnAbs) may develop earlier after HIV infection compared to adults. To define the  
28 frequency and kinetics of bnAb responses in a larger pediatric cohort, we evaluated plasma from  
29 212 ART-naïve, children living with HIV aged 1 to 3 years. Neutralization breadth and potency  
30 was assessed using a panel of 10 tier-2 viruses and compared to those of adults with chronic  
31 HIV. Further, the magnitude, epitope specificity and IgG subclass distribution of Env-specific  
32 antibodies were also assessed using a binding antibody multiplex assay. We found that 1-year-  
33 old children demonstrated neutralization breadth comparable to that of chronically-infected adults,  
34 and breadth continued to increase with age such that the pediatric cohort overall exhibited  
35 significantly greater neutralization breadth than adults ( $p= 0.014$ ). Similarly, binding antibody  
36 responses increased with age, and the levels in 2 to 3 year-old children were comparable to those  
37 of adults. Overall, there was no significant difference in antibody specificities or IgG subclass  
38 distribution between the pediatric and adult cohorts. Interestingly, the neutralization activity was  
39 mapped to a single epitope (CD4 binding site, V2 or V3 glycans) in only 5 of 38 pediatric broadly  
40 neutralizing samples, suggesting a polyclonal neutralization response may develop in most  
41 children. These results contribute to a growing body of evidence suggesting that the early life  
42 immune system may present advantages for the development of an effective HIV vaccine.

43

44

45 **Author summary**

46 Understanding the development of broadly neutralizing antibodies during natural HIV infection is  
47 critical to provide insights for the development of an effective vaccine. In this study, we used a  
48 large cohort (n=212) of HIV infected children aged 1-3 years old to define the frequency and  
49 kinetics of broad neutralization in comparison to adults with chronic HIV. We also evaluated the

50 magnitude and epitope specificity of HIV Env-specific antibodies in children and adults. We  
51 observed that both the binding and neutralizing antibody responses increased with age.  
52 However, by one year of age, children had neutralization breadth comparable to that of  
53 chronically infected adults; and overall, 1-3 year-old children demonstrated higher neutralization  
54 breadth than adults. Only slight differences in epitope-specificity and IgG subclass distribution  
55 were observed between children and adults, suggesting that these factors are not major  
56 contributors to the observed age-related difference in neutralization breadth. The epitope  
57 specificity of the neutralizing antibodies could not be mapped in the majority of children,  
58 suggesting that their response may be polyclonal. Our study contributes to the body of work  
59 indicating a potential advantage of the early life immune system for the elicitation of broad  
60 neutralization.

61

## 62 INTRODUCTION:

63 The global HIV pandemic persists despite increased availability of antiretroviral (ARV)  
64 treatment. In 2019, 1.5 million people aged 15 years and above became newly infected with HIV  
65 and 460,000 of these infections occurred in young adults aged 15-24 [1]. Furthermore,  
66 adolescents represent the only age group that has experienced increased numbers of AIDS-  
67 related deaths over the last decade [2]. While the need for an HIV vaccine is clear, it is critical  
68 that this vaccine be designed for administration prior to sexual debut to both protect during the  
69 vulnerable window of adolescence, as well as generate lifelong immunity.

70 Passive immunization studies in animal models have demonstrated that antibodies  
71 capable of neutralizing HIV-1 can protect from virus acquisition [3]. Elicitation of broadly  
72 neutralizing antibodies (bnAbs) is therefore believed to be crucial for vaccine efficacy. However,  
73 traditional vaccine approaches have failed to induce bnAb responses [4]. Furthermore, only a  
74 subset of chronically HIV-infected adults (10-30%) develops bnAbs and they only develop them  
75 after several years of infection [5]. Understanding how neutralization breadth develops during  
76 natural infection will be necessary to guide novel vaccine development strategies.

77 In HIV-infected individuals, bnAbs target epitopes in conserved areas of the Env  
78 including the CD4-binding site, V1V2-glycan region, and V3-glycan region on gp120; and the  
79 gp120-gp41 interface and fusion domain and membrane proximal external region (MPER) on  
80 gp41 [6]. Immunogenetic characterization of bnAbs identified in adults has demonstrated  
81 unusual traits such as high levels of somatic hypermutation (SHM), nucleotide insertions and  
82 deletions, long complementary determinant region 3 (CDR3) lengths, and restricted variable  
83 gene use [7]. Recently, studies have evaluated the presence of bnAbs in HIV-infected children.  
84 Notably, Goo et al. (2014) reported that children develop cross-clade neutralization by two years  
85 of age [8]. Moreover, Meunchhoff et al. (2016) observed that 75% of HIV-infected  
86 nonprogressor children aged  $\geq$  five years but only 19% of chronically infected adults

87 demonstrated neutralization breadth [9]. Altogether, these previous studies suggest that HIV-  
88 infected children develop neutralization breadth earlier and more frequently than infected adults.

89 Epitope mapping of neutralizing Abs in pediatric cohorts has suggested that bnAbs from  
90 children target the same key epitopes on HIV-1 Env glycoproteins as bnAbs from adults.  
91 However, in contrast to adults, where broadly neutralizing activity is typically attributed to a  
92 single or a few distinct epitope specificities [10] plasma neutralization in children appears to be  
93 polyclonal [11]. Furthermore, distribution of these bnAb specificities differed from corresponding  
94 maternal plasma, with a higher prevalence of MPER-specific Abs and decreased titers of V2-  
95 glycan specific Abs. Thus, it is possible that the mechanism by which children achieve broad  
96 plasma neutralization is distinct.

97 Despite these recent findings, our knowledge of the ontogeny of Env-specific Ab  
98 responses in pediatric settings remains incomplete. While several studies have investigated the  
99 ontogeny and IgG subclass distribution of HIV-specific Abs in HIV-infected adults [12], few  
100 studies have been conducted in young children [13]. Further characterization of Env-specific  
101 binding responses and IgG subclass distribution in infants and young children might guide the  
102 design of vaccines targeting the early life period.

103 Importantly, previous studies investigating neutralization breadth development in  
104 children have several inherent limitations such as small cohort size [8] or focus on the specific  
105 population of nonprogressor children [9]. To define the frequency and kinetics of bnAb in HIV-  
106 infected children, we acquired plasma samples from 212 ART-naïve, clade B HIV-infected  
107 children infected either *in utero* or at the time of delivery from the International Maternal,  
108 Pediatric, Adolescent AIDS Clinical Trials (IMPAACT) repository. In addition, we obtained  
109 plasma samples from 44 ART-naïve HIV chronically-infected adults from the Neutralization  
110 Serotype Discovery Project (NSDP) study [14] for comparison. Using these two cohorts, we  
111 compared the magnitude, specificity, and IgG subclass distribution of HIV-1 Env-specific Abs  
112 between HIV-infected children and adults. In addition, we compared neutralizing antibody

113 responses in children to those of adults using a global panel of HIV-1 strains [15] and key  
114 epitopes targeted by pediatric neutralizing antibodies were identified. To our knowledge, this  
115 study represents the most comprehensive analysis of HIV neutralizing antibody responses in a  
116 large cohort of young children conducted to date.

117

## 118 **RESULTS:**

### 119 **HIV-1 Env-specific Ab binding responses in the pediatric cohort in comparison to adults.**

120 A panel of 17 HIV-1 antigens was used to assess the breadth and epitope-specificity of HIV-1  
121 Env-specific IgG in cross sectional samples of children with HIV, aged one to three years,  
122 (n=212) and in clade B chronically infected adults (n=44). Because these children acquired  
123 infection *in utero* or around birth, their age reflects the duration of infection. The breadth of the  
124 HIV-specific binding antibodies was comparable between children and adults and we observed  
125 no difference in the magnitude of binding to cross-clade specific HIV-1 gp120 and gp140  
126 antigens between the two groups (**Figure 1**). More than 90% of children and adults had  
127 antibodies that bind to all the Env glycoproteins tested, except for A244 gp120 (Supplemental  
128 Table 1). The frequency of responders against A244 gp120 was higher in adults than in children  
129 (86 vs 70%,  $p=0.032$ ), but comparable frequencies were observed for the other antigens.  
130 Interestingly, the magnitude of the IgG binding against most antigens increased between one  
131 and two years of age, but was comparable between two and three year-old children  
132 (Supplemental Figure 1). Thus, Env-specific antibody levels progressively increase during the  
133 first two years of life in perinatally infected children and, by two years of age, their antibody  
134 levels are comparable to that of chronically infected adults.

135 Env-specific antibodies from adults and children generally bound to the same epitopes,  
136 but slight differences were observed between the two groups for some of the tested epitopes.  
137 Notably, children had higher levels of antibodies against the constant region 1 (C1) and the  
138 MPER region whereas adults had higher levels of antibodies against the constant region 5 (C5).

139 Similarly, a higher percentage of children than adults had detectable antibodies against the  
140 MPER (79% vs 61%,  $p=0.017$ ) and the C1 peptide (58% vs 11%,  $p<0.001$ ) whereas the  
141 frequency of antibodies against the C5 peptide was higher in adults than in children (77% vs  
142 42%,  $p<0.001$ ). Thus, overall, HIV-infected children demonstrated robust Env-specific antibody  
143 responses that largely target the same Env regions as adult antibodies.

144

145 **HIV-1 Env-specific IgG subclass distribution in HIV-1 infected adults and children.** We  
146 then measured the magnitude and frequency of Env-specific IgG1, 2, 3 and 4 in the pediatric  
147 and adult samples. Children tended to have a lower magnitude gp120-specific IgG1 responses  
148 as compared to adults ( $p=0.042$ ) and both adults and children had very high magnitude of gp41-  
149 specific antibodies (**Figure 2**). Children also had lower magnitude gp41-specific IgG3  
150 ( $p=0.006$ ), and lower levels of Env glycoprotein-specific IgG4 than adults ( $p<0.001$  for gp140,  
151 gp120 and gp41). In contrast, children had higher magnitude gp41-specific IgG2 antibodies  
152 ( $p=0.004$ ) as compared to adults. Similar to total IgG, the levels of gp120-specific IgG1  
153 increased with age, whereas low levels of antibodies from the other IgG subclass were  
154 observed across the age groups (Supplemental Figure 2).

155 While the majority of adults and children had detectable levels of Env glycoprotein-  
156 specific IgG1 (94 to 100%), slight differences in the frequency of the other subclasses were  
157 observed between adults and children (Supplemental Table 2). Most adults and children had  
158 IgG3 and IgG4 against gp41 but a higher proportion of children had gp41-specific IgG2 when  
159 compared to adults (87% vs 48%,  $p<0.001$ ). In contrast, IgG4 antibodies against gp120 were  
160 detected more frequently in adults than in children (48% vs 22%,  $p=0.002$ ). Approximately half  
161 of the adults and children had gp120-specific IgG3 and approximately 20% had gp120-specific  
162 IgG2. The proportion of adults and infants with detectable levels of IgG subclass antibodies  
163 against the variable loop 2 (V2) and the variable loop 3 (V3) was comparable.

164

165 **HIV neutralization responses in HIV-infected children as compared to infected adults.**

166 The ability of pediatric samples to mediate broad neutralization was assessed against a panel of  
167 10 HIV-1 pseudoviruses from the global neutralization panel. This panel was selected from 219  
168 pseudoviruses to be representative of the global diversity of circulating HIV-1 strains [15]. The  
169 neutralization potency and breadth in children was compared with previously reported data of  
170 117 chronically infected adults from the NSDP [14]. Overall 69% of the children and 68% of  
171 adults neutralized at least 50% of the viruses in the panel with an ID50  $\geq$ 50. The frequency of  
172 broad neutralization slightly increased with age, as only 60% of one-year old children but 76% of  
173 two-year old children were able to neutralize 50% of the viruses. Comparable percentage of  
174 two-year old and three-year old children (76% vs 75%) neutralized 50% of the viruses with an  
175 ID50  $\geq$ 50. Using a more stringent ID50 cutoff of 100, we observed that 26% of children but only  
176 19% of adults neutralized 50% of the viruses with an ID50  $\geq$ 100. The percentage of children  
177 neutralizing 50% with ID50  $>$ 100 was comparable across the age groups (23% for one-year old,  
178 29% for two and three-year old). There was no statistical difference in the percentage of  
179 children and adults that were able to neutralize 5/10 viruses (**Table 2**). A higher percentage of  
180 children than adults were able to neutralize 4/10 viruses (HIV TRO11: 78% vs 68%,  $p=0.048$ ;  
181 HIV X2278: 86% vs 75%,  $p=0.015$ ; HIV 246F3: 71% vs 48%,  $p<0.001$ ; HIV CH119: 88% vs  
182 67%,  $p<0.001$ ), whereas a higher percentage of adults neutralized one virus (HIV X1632: 63%  
183 vs 28%,  $p<0.001$ ). Thus, overall, the pediatric cohort demonstrated comparable or superior  
184 neutralization frequency as compared to adults for 9/10 viruses tested. Children also  
185 demonstrated comparable or superior neutralization potency (**Figure 3**). The median  
186 neutralization titer was higher in children than in adults for 4/10 viruses tested whereas adult  
187 samples demonstrated higher neutralization potency against one virus.

188 To assess the totality of the virus neutralization activity, neutralization scores were  
189 generated for each pediatric and adult sample. The neutralization score was defined as the  
190 average area under the magnitude-breadth curve (AUC) of the neutralization curve for all tested



191 viruses. Overall, the neutralization score was higher in children than in adults ( $p=0.014$ , **Figure**  
192 **4a**). As with other antibody measurements, the neutralization score increased with age across  
193 the one, two, and three-year old age groups ( $p=0.014$ , **Figure 4b**), but importantly, the  
194 neutralization score in one-year old children was comparable to that of adults ( $p=0.44$ , **Figure**  
195 **4c**). Thus, by one year of age, the plasma neutralization activity in perinatally infected children is  
196 comparable to that of chronically infected adults.

197 Because the neutralization score is influenced both by the proportion of the viruses  
198 neutralized as well as the potency with which these viruses are neutralized, magnitude-breadth  
199 curves were generated to determine the relative contribution of breadth and potency on the  
200 superior neutralization breadth score of children (**Figure 5**). The average ID50 of the pediatric  
201 cohort was significantly greater than that of the adult cohort with a similar proportion of viruses  
202 neutralized, indicating that the higher neutralization score observed in children is mostly driven  
203 by a superior neutralization potency with comparable number of viruses neutralized.

204

#### 205 **Association between neutralization breadth and clinical factors in HIV-infected children.**

206 To explore the potential association between neutralization breadth and patient clinical factors,  
207 we performed linear regression analyses between pediatric neutralization breadth scores and  
208 patient CD4 T cell percentage and absolute counts provided by the IMPAACT repository  
209 (Supplemental Figure 4). We found a weakly positive association between neutralization  
210 breadth score and CD4+ T cell percentage (slope=0.01,  $p=0.002$ ) as well as with CD4+ T cell  
211 counts (slope=0.07,  $p=0.003$ ). We also explored the association between viral load and  
212 neutralization breadth and we did not observe a significant association (slope 0.10,  $p=0.28$ ).  
213 However, this analysis was limited by the small number of children with available viral load in  
214 the IMPAACT database ( $n=15$ ). The impact of other clinical factors such the timing of infection  
215 (intrauterine versus perinatal) could not be evaluated due to the paucity of information in the

216 IMPAACT database. Nevertheless, our results suggest that factors other than CD4 T cell could  
217 likely contribute to drive neutralization breadth development in children.

218 We also examined associations between neutralization and binding antibody responses  
219 (supplemental table 3). We observed a weak, but statistically significant correlation between  
220 total gp120 and gp140 IgG and neutralization score. Moreover, gp140 IgG4 and gp41 IgG4  
221 levels were weakly associated with neutralization score. There was no association between  
222 antibody specificity that differ between adults and children (such as C1 or C5-specific IgG) and  
223 neutralization score. Overall this data suggest a possible weak association between IgG  
224 subclass distribution and breadth development in young children.

225

226 **Epitope specificity of neutralizing antibodies in HIV infected children.** Pediatric samples  
227 that were able to neutralize  $\geq 5$  viruses with an ID<sub>50</sub> $\geq 100$  (n=38) were utilized to map the  
228 epitope specificity of neutralizing antibodies. Neutralization assays were performed against a  
229 virus from the global panel that the plasma sample neutralized potently (either HIV TRO11,  
230 25710 or BJOX002) and against a panel HIV-1 pseudoviruses with selective mutations to  
231 abrogate the neutralization potency of a specific class of broadly neutralizing antibodies [16]  
232 (Supplemental Table 3). In addition, the samples were tested against a mutant pseudovirus  
233 TRO11.W672A to assess the presence of MPER-specific antibodies. A total of 5/38 plasma  
234 samples demonstrated at least a 3-fold reduction in ID<sub>50</sub> against one mutant as compared to  
235 the parent virus (**Table 4**). Three samples demonstrated substantial reduction of neutralization  
236 against a mutant that abrogates activity of V3 glycan-specific bnAbs, whereas one sample  
237 demonstrated reduced neutralization of a mutant that abrogates activity of CD4 binding site  
238 bnAbs, and the last showed reduced activity against a mutant that abrogates the activity of V2  
239 glycan-specific bnAbs. None of the plasma samples demonstrated a dominant MPER reactivity.  
240 Thus, the epitope specificity of the neutralizing antibodies could not be mapped in 33/38 HIV-  
241 infected children with strong bnAb activity.

242

243 **Association between binding antibody responses and neutralization epitope specificity**

244 We conducted analysis to determine if there is an association between the levels of epitope-  
245 specific binding antibodies and the neutralization specificity. PTD 2 (from Table 4) in which  
246 neutralization specificity mapped to V2-glycan epitopes demonstrated moderately high V1V2-  
247 specific IgG and IgG1 response ranking at the 65% and 56% percentile in the distribution of  
248 these responses. No V1V2-specific IgG2, IgG3 or IgG4 was detected in this child (supplemental  
249 Figure 5). The three children (PTD 3-5) in which neutralization specificity mapped to V3 glycan  
250 dependent epitopes demonstrated high V3-specific IgG binding ranking at the 75, 85, and 83%  
251 percentile of the IgG distribution. They also demonstrated high V3-specific IgG1 ranking at the  
252 61, 79, and 75% percentile for the IgG1 distribution, whereas the levels of the other IgG  
253 subclass were variable. Thus, while high levels of V1V2 or V3-specific IgG or IgG 1 antibodies  
254 are not indicative of V2 or V3-specific neutralizing antibody responses, when children exhibited  
255 neutralizing antibodies to a particular site they tended to have high binding antibodies to the  
256 same site.

257

258 **DISCUSSION**

259 While induction of a broad neutralizing antibody response is a critical goal for HIV  
260 vaccine, current immunization approaches have failed to achieve this goal [17]. Recent reports  
261 indicating that: 1) HIV vaccination can elicit more robust and durable antibody responses in  
262 infants than in adults [18] [19]; and 2) that children may develop broad neutralization more  
263 frequently and earlier than adults [9], suggest that the early life immune system may present  
264 advantages to overcome the unique immunologic challenges posed by the induction of  
265 neutralization breadth through vaccination. The purpose of this study was to assess the  
266 presence and characteristics of broadly neutralizing antibodies in a large cohort of HIV-infected,  
267 ART-naïve young children and compare the kinetics of the development of bnAb responses

268 after infection to that of chronically-infected adults. Our results are in concordance with prior  
269 reports indicating that children are able to develop broad neutralizing antibody responses and,  
270 importantly, that the mechanism of breadth development may differ between adults and children  
271 [8, 9].

272 Only a few studies have assessed broad neutralizing antibody responses in HIV infected  
273 children. Notably Goo et al, investigated broad neutralization in a small cohort (n=28) of clade A  
274 infected children from Kenya and reported that broad neutralization could be detected in infants  
275 as early as one year after infection [8]. Subsequently, Muenchhoff et al., investigated broad  
276 neutralization in a cohort of children from South Africa (aged >5 years) and reported higher  
277 frequency of broad neutralization in children as compared to chronically infected adults [9]. In  
278 contrast to these previous studies, our study focused on a large cohort of clade B HIV-infected  
279 children. Moreover, we focused on children aged 1 to 3 to specifically define the kinetics of the  
280 development of broad neutralization in children, as HIV-infected adults usually develop  
281 neutralization breadth after several years of infection [44]. This age range excluded the possibility  
282 that passive maternal antibodies contributed to the measured neutralization as before one year  
283 of age it would be difficult to decipher the contribution of maternal versus infant antibodies. The  
284 uniqueness of this historical set of pediatric ART naïve samples is worth noting as the WHO  
285 now recommends initiation of ART at the time of diagnosis. To assess neutralization breadth,  
286 we used viruses from the global neutralization panel [18]. We observed that one year old HIV-  
287 infected children can demonstrate broad neutralization, corroborating the findings of Goo et al  
288 [8] that HIV-neutralization can develop rapidly in early life. Yet, in contrast to the findings from  
289 Muenchhoff et al., (2016) who reported more frequent bnAb development in children than in  
290 adults (75% vs 19%,  $p < 0.0001$ ) [9], we found that the proportion of children and adults who  
291 neutralized 50% of the viruses was comparable (69% vs 68%). Comparable frequencies  
292 between the groups were still observed when we only considered children and adults who  
293 neutralize 50% of viruses with ID<sub>50</sub> >100 (26% vs 19%,  $p = 0.13$ ). Interestingly, Makhdoomi et

294 al., reported that the neutralization breadth in HIV- infected children from India aged 5 to 17  
295 years [45] increased over time. In our study, although we did not test longitudinal samples, we  
296 compared the neutralization activity across the children's age groups. We found that the  
297 neutralization scores increased with age (Fig 4), but by one year of age, the breadth potency  
298 neutralization score was comparable to that of chronically infected adults. Thus, the fact that our  
299 cohort was younger than that of Muenchhoff et al., may contribute to explain the differences in  
300 observed results. Furthermore, whereas our cohort was US- based (predominant clade B  
301 infections), their cohort was South African based (predominant clade C infections). The South  
302 African cohort also focused on the specific subpopulation of nonprogressors [9] and the virus  
303 panels used in the two studies to assess neutralization breadth were different. Finally, it is  
304 possible that differences in transmission modes between the two cohorts contributed to the  
305 slightly divergent results [20]. In our US-based cohort, transmission occurred in utero and  
306 perinatally, whereas breast milk transmission is also an important mode of transmission in  
307 South Africa. Despite these differences, it is worth noting that our results combined with those of  
308 previous studies establish that children are able to rapidly develop broad neutralizing antibody  
309 responses after HIV infection.

310 Several studies have attempted to understand immune differences between children and  
311 adults, with particular focus on the first 12 months of life and the development of B cell  
312 populations [21-26]. However, although several studies have investigated the kinetics of HIV-  
313 specific binding antibodies in adults, less is known about pediatric HIV-specific antibody  
314 responses. We found that although the magnitude of HIV-specific binding Ab responses against  
315 key Env epitopes was lower in one-year-old children, by two years of age it was comparable to  
316 that of adults (Supplemental Figure 1). While we found no difference in binding breadth between  
317 adults and children, we observed some slight differences in IgG binding epitope specificities  
318 between the two groups. Notably, MPER and C1-specific antibodies were higher in children  
319 than in adults whereas C5-specific antibodies were higher in adults. It has also been previously

320 reported that infants develop antibodies against the HIV gp160 precursor glycoprotein first, in  
321 contrast to adults who first develop anti-gp41 antibodies, which suggests possible differences in  
322 the kinetics of HIV-specific Abs between these two populations [13, 27]. Overall, the difference  
323 in epitope specificities between adults and children suggests that similar immunogens could  
324 elicit distinct responses in these two populations, an observation that may be relevant for  
325 vaccine development and monitoring.

326 Previous studies indicated that increased levels of HIV-specific IgG2 and IgG4 during early  
327 HIV infection in adults correlate with development of broad neutralization [28]. Moreover, an  
328 association between high levels of IgG3 and neutralization have been reported [29]. We  
329 therefore investigated if a distinct IgG subclass distribution in children as compared to adults  
330 may contribute to explain the early development of broad neutralization. Overall, we found that  
331 the IgG subclass profiles of the pediatric and adult cohorts were grossly similar with only a few  
332 statistically significant differences. Most notably, we observed that the majority of children  
333 mounted a detectable gp41-specific IgG2 response, whereas this response was seen in less  
334 than half of chronically infected adults. The clinical significance of this difference is unclear as  
335 there was no association between this response and neutralization breadth. The ability of  
336 children to produce IgG2 is usually delayed compared to other subclasses [30], thus the  
337 observation that young children develop more robust IgG2 responses than adults is somewhat  
338 surprising. Nevertheless, as an association between low levels of gp41-specific IgG2 are usually  
339 associated to later stage disease [31], the higher levels of gp41-specific IgG2 in children may  
340 simply be a marker of a more recent infection. Interestingly, it was recently reported that IgG3  
341 enhances the neutralization activity of a HIV V2-specific bnAb [16]. Thus, we were interested to  
342 define if higher HIV-specific IgG3 were observed in children. For most antigens, there was no  
343 difference in the magnitude of IgG3 responses between adults and children, except for gp41  
344 and V1V2 that were higher in adults than in children. Thus, overall, our results suggest that IgG

345 subclass distribution may not contribute to the early development of broad neutralization in  
346 children.

347  
348 Previous studies have suggested that in contrast to adults in which a single epitope  
349 specificity frequently mediate neutralization breadth [32, 33], plasma broad neutralization in  
350 children may be mediated by a polyclonal response. For example, Goo et al, were not able to  
351 map the epitope specificity of broad neutralization in the majority of the children from their  
352 cohort suggesting that either the pediatric neutralizing antibodies target novel neutralization  
353 epitopes that are distinct from adults or broad neutralization is mediated by polyclonal  
354 antibodies. Ditse et al, [11] analyzed the epitope specificity of neutralizing antibodies in 16 clade  
355 C infected nonprogressor children from South Africa. They observed that the majority of children  
356 had antibodies targeting multiple known neutralization epitopes, and that most children had  
357 antibodies against V2 and V3-glycan dependent epitopes whereas MPER antibodies rarely  
358 confer breadth to children. Similarly, Mishra et al [46] reported that plasma bnAbs targeting the  
359 V2-apex were predominant in a small cohort of 10 elite neutralizers infants from India. In their  
360 study, only two children demonstrated responses against multiple neutralizing epitopes. In  
361 contrast to these previous studies, we were only able to map neutralization to a dominant  
362 epitope in five out of 38 samples tested. In three of these, broad neutralization was mediated by  
363 V3-glycan dependent antibodies, whereas V2-glycan dependent and CD4 binding site antibody  
364 were the dominant neutralizing epitopes in the other two samples, respectively. While it is  
365 possible that our selection of mutant pseudoviruses did not capture an existing dominant  
366 epitope, the most common bnAb targets- V2 glycan, V3 glycan, CD4bs, MPER and gp120-gp41  
367 interface [11]- were represented in our panel, and thus it is likely that the fact that we could not  
368 map the dominant specificity in 33/38 samples indicate that breadth was mediated either by a  
369 polyclonal response or that these pediatric nAbs target a novel neutralization epitope. A  
370 dominant polyclonal response in children may indicate that the mechanisms by which the



371 pediatric and adult immune systems generate plasma broad neutralization could differ. In adults,  
372 it has been proposed that the development of bnAbs results from cooperation between multiple  
373 B cell lineages; “cooperative” lineages react to and select for escape mutants, which allows the  
374 bnAb lineage to be continually stimulated by the founder virus to the extent of sustained affinity  
375 maturation [7]. Our findings may suggest that the abundance of naïve B cells in children allows  
376 for activation of multiple independent B cell lineages upon HIV infection leading to a polyclonal  
377 response. Thus, plasma broad neutralization in children could be mediated by the additive  
378 activity of a collection of antibodies with limited to moderate neutralization.

379         Elucidating the mechanisms through which children achieve broad neutralization will be  
380 critical to guide vaccine development. Importantly, analysis of two V3-glycan dependent bnAbs  
381 isolated from children indicated that breadth was acquired through a pathway distinct from that  
382 of adult antibodies from the same class [34, 35] with notably lower levels of somatic  
383 hypermutation and early accumulation of critical improbable mutations [36]. Identifying and  
384 characterizing more Abs from children is imperative to determine if low levels of SHM is a  
385 consistent unique feature of pediatric nAbs. This knowledge will ultimately guide HIV vaccine  
386 strategies aiming at inducing broad neutralization. Such strategies could involve initiation of  
387 vaccination early in life (following the immunization schedule for the under 5 year olds) and  
388 boosting through pre-adolescence in order to achieve protective immunity prior to sexual debut.

389

## 390 **MATERIALS AND METHODS:**

### 391 **Samples:**

392 Pediatric plasma samples from ART-naïve children aged one, two and three-years old (n=212)  
393 who were enrolled in the completed IMPAACT studies ACTG 152, 300, 382 and 390 [37-40]  
394 were obtained from the IMPAACT biospecimen repository. All these children were assumed to  
395 be infected with clade B HIV-1 at birth or *in utero* as they were born to women who acquired HIV  
396 in the US. Adult plasma samples (n=44) were obtained from ART-naïve adults with chronic



397 clade B HIV-1 infection of  $\geq$  three years who participated in the Neutralization Serotype  
398 Discovery Project [14]. A summary of the clinical characteristics of the included patients in  
399 provided in Table 1.

400 **Binding antibody multiplex assay for the *measurement of Env-specific IgG*:**

401 A previously described binding antibody multiplex assay (BAMA) [27] was used to measure IgG  
402 binding to a panel of 17 HIV-1 antigens. These included: 1) cross-clade gp120s (Con6 gp120/B,  
403 MNgp120, and A244 gp120); 2) cross-clade gp140s (B.con\_env03 gp140, ConS gp140 CFI,  
404 A1.Con gp140, and 1086C gp140); 3) gp70 scaffold Env constructs (gp70\_B.CaseA\_V1V2,  
405 gp70 MNV3); 4) a clade B recombinant gp41 (RecMN gp41); 5) peptides representing the V2  
406 (Bio-V2.B), the V3 ( Bio-V3.B), the MPER (MPER656) the C5 (RV144 C5.2B) and the C1 (C1  
407 Biotin) regions of the HIV Env; and finally 6) YU2 Core, YU2 Core D368R mutant to assess  
408 antibodies against the CD4 binding site. A pilot study was conducted to determine the optimal  
409 testing dilution for the samples. This dilution was 1:100 dilutions for all antigens except for the  
410 gp140s, Bio-V3B and recMNgp41 that were tested at 1:2000. Total antigen-specific IgG was  
411 then detected with a mouse anti-human IgG phycoerythrin-conjugated Ab (Southern Biotech) at  
412 2  $\mu$ g/mL. Binding was measured using a Bio-Plex 200 instrument (Bio-Rad Laboratories, Inc.).  
413 HIV-1 human hyperimmune immunoglobulin (HIVIG) derived from the plasma of HIV-1-infected  
414 donors was used as a positive control and normal human serum was used as a negative  
415 control. IgG responses were expressed as mean fluorescence intensity (MFI). All MFI values  
416 were adjusted for nonspecific binding by subtracting the MFI of blank beads, except for  
417 gp70\_B.CaseA\_V1V2 and gp70 MNV3, which were adjusted by subtracting the MFI of beads  
418 coupled with a control gp70 construct (MuLVgp70). An HIV Env-specific Ab response was  
419 considered positive if it had MFI values above a positivity cutoff determined as highest of either  
420 the mean plus 3 standard deviations of the MFI of a panel of 20-30 HIV negative plasma, or the  
421 lower detection limit of 100 MFI. To ensure consistency between assays, 50% effective

422 concentration and maximum MFI values of HIVIG control were tracked by Levey-Jennings  
423 charts [41].

424 **Binding antibody multiplex assay for the *measurement of IgG subclasses*:**

425 Measurement of IgG subclass-specific HIV-1 binding Ab response was conducted as described  
426 above with some modifications. All plasma samples were tested against a limited panel of 5  
427 HIV-1 antigens: B.con\_env03 gp140, MNgp120, gp70\_B.CaseA\_V1V2, gp70 MNV3, and Rec  
428 MN gp41 at a 1:50 dilution. Antigen-specific subclass response was detected using biotin-  
429 conjugated mouse anti-human IgG1 (BD Pharmingen, 4µg/L), IgG2 (Southern Biotech, 5ug/mL),  
430 IgG3 (Calbiochem, 2µg/mL), or IgG4 (BD Pharmingen, 2µg/mL) and tertiary detection agent  
431 streptavidin-phycoerythrin (BD Biosciences) at 5 µg/mL.

432 **Neutralization Assays:**

433 Neutralization was measured as the ability of plasma samples to reduce virus infection of TZM-  
434 bl cells as previously described [42] against a panel of 10 viruses from the global neutralization  
435 panel (deCamp et al., 2014) [15] (Table 2). Briefly, plasma samples were incubated with an HIV-  
436 1 pseudovirus for 45-90 min at 37°C, then TZM-bl cells were added and plates were incubated  
437 for 48 hr. A luciferase substrate (Bright-Glo; Promega) was added, and luminescence was  
438 measured. Results were reported as the 50% inhibitory dilution (ID50), which is the dilution of  
439 plasma resulting in 50% reduction in luminescence compared to that of virus control wells.

440 **Mapping of Neutralizing Epitopes:**

441 Plasma neutralization was assayed against a mutant panel of HIV-1 strains BJOX002, 25710, or  
442 TRO.11 as described above. Panel choice was dependent on which parent virus was most  
443 potently neutralized by the plasma sample. Each panel consisted of 6-11 HIV-1 Env epitope  
444 knockout pseudoviruses (Supplemental Table 4). Significant reductions in ID50 between parent  
445 and knockout virus suggests that epitope contributes to the neutralization ability of that sample.  
446 In addition, samples were tested for MPER reactivity using TRO.11.W672A pseudotyped virus.

447

448 **Statistical analysis**

449 All statistical analyses were performed in the R statistical computing and graphics environment.  
450 For two sample tests we used Mann-Whitney rank-based tests [47]. Neutralization scores were  
451 computed as the area under the magnitude-breadth (M-B) curve, which describes the  
452 magnitude (NAb titer) and breadth (number of isolates neutralized) of an individual plasma  
453 sample assayed against all tested viruses, and equals the average log<sub>10</sub> titer over the targets  
454 [48]. All p-values are two-sided. Boxplots were used to graphically display distributions of log<sub>10</sub>  
455 NAb titers to individual isolates. Positive response rates were compared between groups by  
456 Fisher's exact tests [49]. Median regression was conducted using the quantreg package [50].  
457 Titers of NABs among responders were compared between groups by 95% CIs about the ratio  
458 of GMTs. Equality of the overall distribution of log<sub>10</sub> NAb titers between two groups was tested  
459 as described (46), using 10,000 permuted data-sets to compute a p-value. The false discovery  
460 rate (FDR) was used to determine tests that remained statistically significant after adjustment  
461 for the multiple hypothesis tests. The FDR method was performed at level 0.05. Assessment of  
462 magnitude and breadth of neutralization of a panel of isolates.

463

464 **Acknowledgments**

465  
466 Research reported in this publication was supported by The National Institute of Allergy and  
467 Infectious Diseases (NIAID) of the National Institutes of Health under award number  
468 R01AI143370. Part of the results resulted from research supported by the Duke University  
469 Center for AIDS Research (CFAR), an NIH funded program (5P30 AI064518). The analysis was  
470 partially supported by the NIH award R01AI122991 to YF. Overall support for the International  
471 Maternal Pediatric Adolescent AIDS Clinical Trials Network (IMPAACT) was provided by the  
472 National Institute of Allergy and Infectious Diseases (NIAID) with co-funding from the Eunice  
473 Kennedy Shriver National Institute of Child Health and Human Development (NICHD) and the

474 National Institute of Mental Health (NIMH), all components of the National Institutes of Health  
475 (NIH), under Award Numbers UM1AI068632-15 (IMPAACT LOC), UM1AI068616-15 (IMPAACT  
476 SDMC) and UM1AI106716-15 (IMPAACT LC), and by NICHD contract number  
477 HHSN275201800001I. The content is solely the responsibility of the authors and does not  
478 necessarily represent the official views of the NIH. We are grateful to the clinical teams and  
479 study participants of ACTG 152, 300, 382 and 390.

480  
481  
482  
483  
484  
485  
486  
487  
488

## 489 References

- 490
- 491 1. UNAIDS. *Global HIV & AIDS statistics — 2018 fact sheet*. Available from:
- 492 <https://www.unaids.org/en/resources/fact-sheet>.
- 493 2. UNICEF. *Adolescent HIV Prevention*. Available from:
- 494 <https://data.unicef.org/topic/hivaids/adolescents-young-people/>.
- 495 3. Julg, B., et al., *Broadly neutralizing antibodies targeting the HIV-1 envelope V2 apex*
- 496 *confer protection against a clade C SHIV challenge*. *Sci Transl Med*, 2017. **9**(406).
- 497 4. Fouda, G.G., et al., *Systemic administration of an HIV-1 broadly neutralizing dimeric IgA*
- 498 *yields mucosal secretory IgA and virus neutralization*. *Mucosal Immunol*, 2017. **10**(1): p.
- 499 228-237.
- 500 5. Doria-Rose, N.A., et al., *Breadth of human immunodeficiency virus-specific neutralizing*
- 501 *activity in sera: clustering analysis and association with clinical variables*. *J Virol*, 2010.
- 502 **84**(3): p. 1631-6.
- 503 6. Burton, D.R. and R.A. Weiss, *AIDS/HIV. A boost for HIV vaccine design*. *Science*, 2010.
- 504 **329**(5993): p. 770-3.
- 505 7. Bonsignori, M., et al., *Antibody-virus co-evolution in HIV infection: paths for HIV vaccine*
- 506 *development*. *Immunol Rev*, 2017. **275**(1): p. 145-160.
- 507 8. Goo, L., et al., *Early development of broadly neutralizing antibodies in HIV-1-infected*
- 508 *infants*. *Nat Med*, 2014. **20**(6): p. 655-8.
- 509 9. Muenchhoff, M., et al., *Nonprogressing HIV-infected children share fundamental*
- 510 *immunological features of nonpathogenic SIV infection*. *Sci Transl Med*, 2016. **8**(358): p.
- 511 358ra125.
- 512 10. Tomaras, G.D., et al., *Polyclonal B cell responses to conserved neutralization epitopes*
- 513 *in a subset of HIV-1-infected individuals*. *J Virol*, 2011. **85**(21): p. 11502-19.
- 514 11. Ditse, Z., et al., *HIV-1 Subtype C-Infected Children with Exceptional Neutralization*
- 515 *Breadth Exhibit Polyclonal Responses Targeting Known Epitopes*. *J Virol*, 2018. **92**(17).
- 516 12. Bricault, C.A., et al., *HIV-1 Neutralizing Antibody Signatures and Application to Epitope-*
- 517 *Targeted Vaccine Design*. *Cell Host Microbe*, 2019. **25**(1): p. 59-72 e8.
- 518 13. Pollack, H., et al., *Ontogeny of anti-human immunodeficiency virus (HIV) antibody*
- 519 *production in HIV-1-infected infants*. *Proc Natl Acad Sci U S A*, 1993. **90**(6): p. 2340-4.
- 520 14. Hraber, P., et al., *Prevalence of broadly neutralizing antibody responses during chronic*
- 521 *HIV-1 infection*. *AIDS*, 2014. **28**(2): p. 163-9.
- 522 15. deCamp, A., et al., *Global panel of HIV-1 Env reference strains for standardized*
- 523 *assessments of vaccine-elicited neutralizing antibodies*. *J Virol*, 2014. **88**(5): p. 2489-
- 524 507.
- 525 16. Li, M., et al., *Human immunodeficiency virus type 1 env clones from acute and early*
- 526 *subtype B infections for standardized assessments of vaccine-elicited neutralizing*
- 527 *antibodies*. *J Virol*, 2005. **79**(16): p. 10108-25.
- 528 17. Haynes, B.F., et al., *HIV-Host Interactions: Implications for Vaccine Design*. *Cell Host*
- 529 *Microbe*, 2016. **19**(3): p. 292-303.
- 530 18. Fouda, G.G., et al., *Infant HIV type 1 gp120 vaccination elicits robust and durable anti-*
- 531 *V1V2 immunoglobulin G responses and only rare envelope-specific immunoglobulin A*
- 532 *responses*. *J Infect Dis*, 2015. **211**(4): p. 508-17.
- 533 19. McGuire, E.P., et al., *HIV-Exposed Infants Vaccinated with an MF59/Recombinant*
- 534 *gp120 Vaccine Have Higher-Magnitude Anti-V1V2 IgG Responses than Adults*
- 535 *Immunized with the Same Vaccine*. *J Virol*, 2018. **92**(1).
- 536 20. Dickover, R.E., et al., *Perinatal transmission of major, minor, and multiple maternal*
- 537 *human immunodeficiency virus type 1 variants in utero and intrapartum*. *J Virol*, 2001.
- 538 **75**(5): p. 2194-203.

- 539 21. Siegrist, C.A. and R. Aspinall, *B-cell responses to vaccination at the extremes of age*.  
540 Nat Rev Immunol, 2009. **9**(3): p. 185-94.
- 541 22. Morbach, H., et al., *Reference values for B cell subpopulations from infancy to*  
542 *adulthood*. Clin Exp Immunol, 2010. **162**(2): p. 271-9.
- 543 23. Duchamp, M., et al., *B-cell subpopulations in children: National reference values*. Immun  
544 Inflamm Dis, 2014. **2**(3): p. 131-40.
- 545 24. Belnoue, E., et al., *APRIL is critical for plasmablast survival in the bone marrow and*  
546 *poorly expressed by early-life bone marrow stromal cells*. Blood, 2008. **111**(5): p. 2755-  
547 64.
- 548 25. Pihlgren, M., et al., *Reduced ability of neonatal and early-life bone marrow stromal cells*  
549 *to support plasmablast survival*. J Immunol, 2006. **176**(1): p. 165-72.
- 550 26. Gatto, D., et al., *Complement receptors regulate differentiation of bone marrow plasma*  
551 *cell precursors expressing transcription factors Blimp-1 and XBP-1*. J Exp Med, 2005.  
552 **201**(6): p. 993-1005.
- 553 27. Tomaras, G.D., et al., *Initial B-cell responses to transmitted human immunodeficiency*  
554 *virus type 1: virion-binding immunoglobulin M (IgM) and IgG antibodies followed by*  
555 *plasma anti-gp41 antibodies with ineffective control of initial viremia*. J Virol, 2008.  
556 **82**(24): p. 12449-63.
- 557 28. Richardson, S.I., et al., *HIV-specific Fc effector function early in infection predicts the*  
558 *development of broadly neutralizing antibodies*. PLoS Pathog, 2018. **14**(4): p. e1006987.
- 559 29. Scharf, O., et al., *Immunoglobulin G3 from polyclonal human immunodeficiency virus*  
560 *(HIV) immune globulin is more potent than other subclasses in neutralizing HIV type 1*. J  
561 Virol, 2001. **75**(14): p. 6558-65.
- 562 30. Blanco, E., et al., *Age-associated distribution of normal B-cell and plasma cell subsets in*  
563 *peripheral blood*. J Allergy Clin Immunol, 2018. **141**(6): p. 2208-2219 e16.
- 564 31. Lal, R.B., et al., *IgG subclass responses to human immunodeficiency virus-1 antigens:*  
565 *lack of IgG2 response to gp41 correlates with clinical manifestation of disease*. Clin  
566 Immunol Immunopathol, 1991. **58**(2): p. 267-77.
- 567 32. Frimat, L., et al., *Anaemia management with C.E.R.A. in routine clinical practice:*  
568 *OCEANE (Cohorte Mircera patients non-dialyses), a national, multicenter, longitudinal,*  
569 *observational prospective study, in patients with chronic kidney disease not on dialysis*.  
570 BMJ Open, 2013. **3**(3).
- 571 33. Walker, L.M., et al., *A limited number of antibody specificities mediate broad and potent*  
572 *serum neutralization in selected HIV-1 infected individuals*. PLoS Pathog, 2010. **6**(8): p.  
573 e1001028.
- 574 34. Simonich, C.A., et al., *HIV-1 Neutralizing Antibodies with Limited Hypermutation from an*  
575 *Infant*. Cell, 2016. **166**(1): p. 77-87.
- 576 35. Kumar, S., et al., *An HIV-1 Broadly Neutralizing Antibody from a Clade C-Infected*  
577 *Pediatric Elite Neutralizer Potently Neutralizes the Contemporaneous and Autologous*  
578 *Evolving Viruses*. J Virol, 2019. **93**(4).
- 579 36. Wiehe, K., et al., *Functional Relevance of Improbable Antibody Mutations for HIV*  
580 *Broadly Neutralizing Antibody Development*. Cell Host Microbe, 2018. **23**(6): p. 759-765  
581 e6.
- 582 37. Bowersox, J., *ACTG 152: new insights into pediatric antiretroviral therapy*. NIAID AIDS  
583 Agenda, 1996: p. 3.
- 584 38. Gilden, D., *ACTG 300 leaves many questions unanswered*. GMHC Treat Issues, 1997.  
585 **11**(7-8): p. 35-6.
- 586 39. Starr, S.E., et al., *Combination therapy with efavirenz, nelfinavir, and nucleoside*  
587 *reverse-transcriptase inhibitors in children infected with human immunodeficiency virus*  
588 *type 1. Pediatric AIDS Clinical Trials Group 382 Team*. N Engl J Med, 1999. **341**(25): p.  
589 1874-81.



- 590 40. Team, P.-S., et al., *First-line antiretroviral therapy with a protease inhibitor versus non-*  
591 *nucleoside reverse transcriptase inhibitor and switch at higher versus low viral load in*  
592 *HIV-infected children: an open-label, randomised phase 2/3 trial.* Lancet Infect Dis,  
593 2011. **11**(4): p. 273-83.
- 594 41. Pollara, J., et al., *Bridging Vaccine-Induced HIV-1 Neutralizing and Effector Antibody*  
595 *Responses in Rabbit and Rhesus Macaque Animal Models.* J Virol, 2019. **93**(10).
- 596 42. Montefiori, D.C., *Evaluating neutralizing antibodies against HIV, SIV, and SHIV in*  
597 *luciferase reporter gene assays.* Curr Protoc Immunol, 2005. **Chapter 12**: p. Unit 12 11.
- 598 44. Gray, Elin S et al. *The neutralization breadth of HIV-1 develops incrementally over four*  
599 *years and is associated with CD4+ T cell decline and high viral load during acute*  
600 *infection.* J Virol, 2011. **85**(10) p. 4828-40.
- 601 45. Makhdoomi MA et. al. *Evolution of cross-neutralizing antibodies and mapping epitope*  
602 *specificity in plasma of chronic HIV-1-infected antiretroviral therapy-naïve children from*  
603 *India.* J Gen Virol, 2017. **98**(7) p. 1879–91.
- 604 46. Mishra, Nitesh et al. *Broadly neutralizing plasma antibodies effective against autologous*  
605 *circulating viruses in infants with multivariant HIV-1 infection.* Nature Comm, 2020. **11**(1)  
606 p. 4409
- 607 47. Mann HB, Whitney DR. *On a test of whether one of two random variables is*  
608 *stochastically larger than the other.* The annals of mathematical statistics. 1947 Mar  
609 1:50-60.
- 610 48. Huang Y, Gilbert PB, Montefiori DC, Self SG. *Simultaneous evaluation of the magnitude*  
611 *and breadth of a left-and right-censored multivariate response, with application to HIV*  
612 *vaccine development.* Statistics in biopharmaceutical research. 2009 Feb 1;1(1):81-91.
- 613 49. Fisher RA. *On the interpretation of  $\chi^2$  from contingency tables, and the calculation of P.*  
614 *Journal of the Royal Statistical Society.* 1922 Jan 1;85(1):87-94.
- 615 50. Koenker R. *Quantile Regression.* 2005. Cambridge University Press, Cambridge, UK.

# Figures & Tables



|                       | Adult Cohort                                                    | Pediatric Cohort                     |            |            |
|-----------------------|-----------------------------------------------------------------|--------------------------------------|------------|------------|
| Cohort Size           | n = 117                                                         | 1-year-old                           | 2-year-old | 3-year-old |
|                       |                                                                 | n = 91                               | n = 62     | n = 59     |
| Gender                | N/A                                                             | ?                                    | ?          | ?          |
| Clade Infected        | Multiple Clade-Infected<br>(with subset of 44 Clade B-Infected) | Clade B-Infected                     |            |            |
| Duration of Infection | Chronically Infected for $\geq 3$ years                         | Infected <i>in utero</i> or at birth |            |            |
| ART Exposure          | ART-naïve                                                       | ART-naïve                            |            |            |

**Table 1. Cohort Clinical Summary**

Pediatric cohort samples were provided by completed IMPAACT studies ACTG 152, 300, 382, and 390. Adult clade B-infected plasma samples were provided by the Neutralization Serotype Discovery Project.

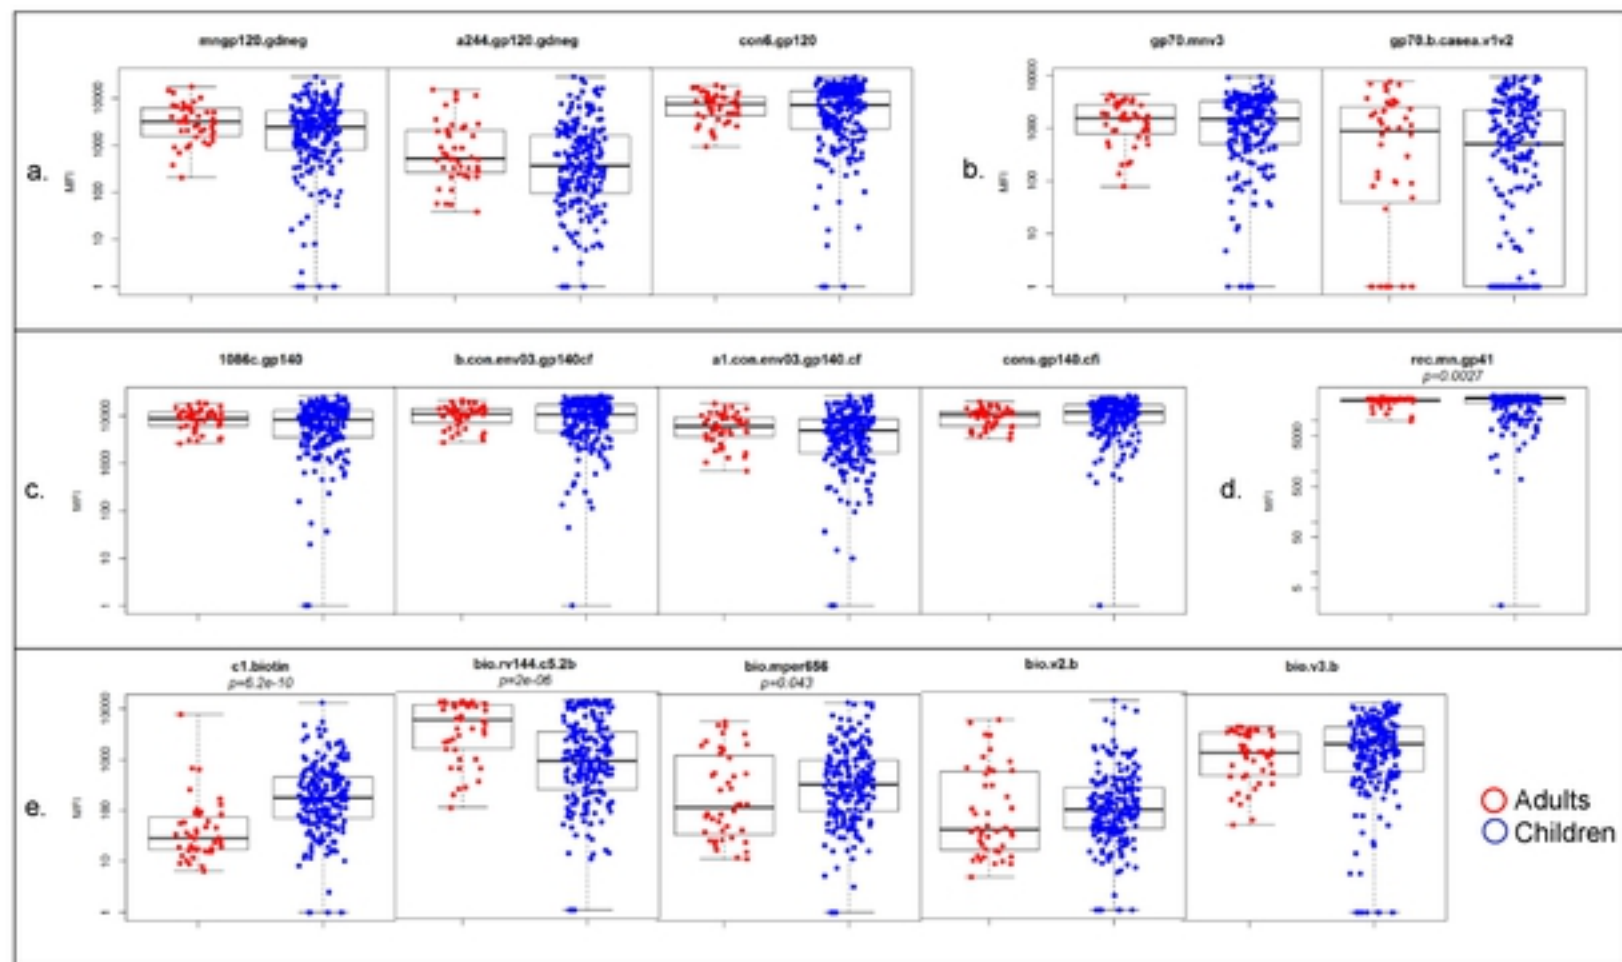

**Figure 1. HIV-1 Env-Specific Total IgG**

Total IgG for select HIV-1 Env epitopes were measured by binding antibody multiplex assay in adult and pediatric cohorts. Epitopes include gp120 (a), variable loops (b), gp140 (c), gp41 (d) and peptides (e). Significant difference between adult and pediatric cohorts by Wilcoxon as noted.

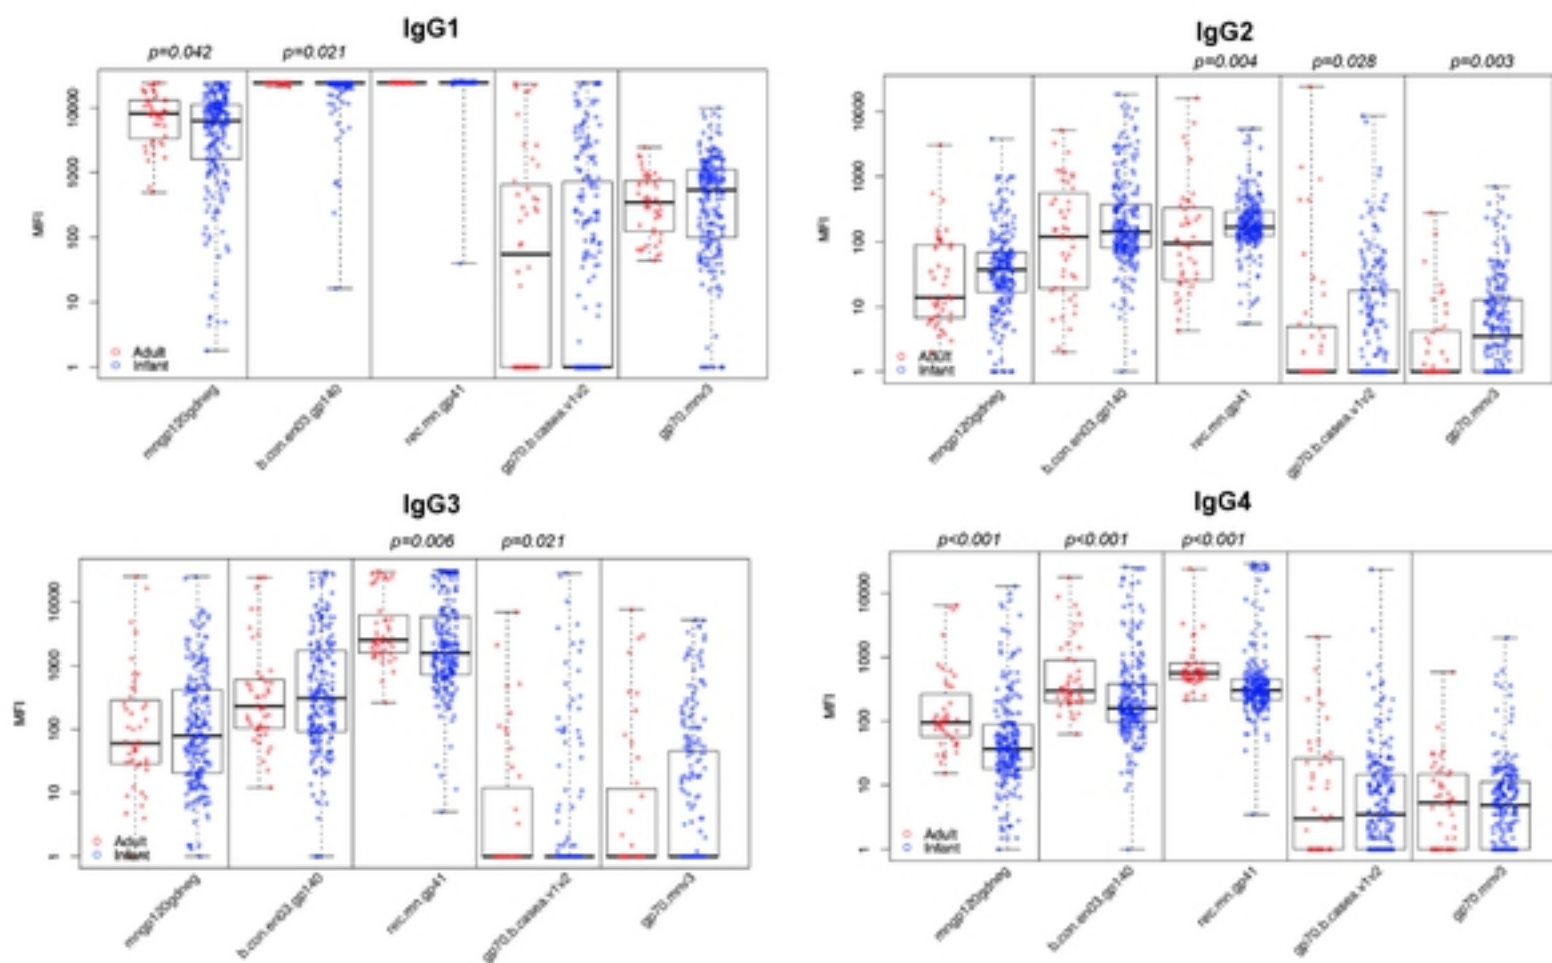

**Figure 2. HIV-1 Env-Specific IgG Subclass.** Individual IgG subclasses for select HIV-1 Env epitopes were measured by binding antibody multiplex assay in adult and pediatric cohorts. Significant difference between adult and pediatric cohorts by Wilcoxon as noted.

| Virus    | Clade    | Adults (%) | Children (%) |         |
|----------|----------|------------|--------------|---------|
| 25710    | C        | 91         | 90           |         |
| TRO11    | B        | 68         | 78           | p=0.048 |
| X2278    | B        | 75         | 86           | p=0.015 |
| BJOX2000 | CRF07_BC | 60         | 55           |         |
| X1632    | G        | 63         | 28           | p<0.001 |
| CE1176   | C        | 62         | 51           |         |
| 246F3    | AC       | 48         | 71           | p<0.001 |
| CH119    | CRF07_BC | 67         | 88           | p<0.001 |
| CE0217   | C        | 46         | 40           |         |
| CNE55    | CRF01_AE | 34         | 41           |         |

**Table 2. Frequency of neutralization response in adults vs. children**

Proportion of adult and pediatric samples with ID<sub>50</sub>>100 for each virus. The pediatric cohort demonstrated comparable or superior neutralization frequency to adults in 9/10 viruses tested. The adult cohort had higher neutralization frequency against only one virus, X1632. Statistically significant p-values included as determined by Fisher test.

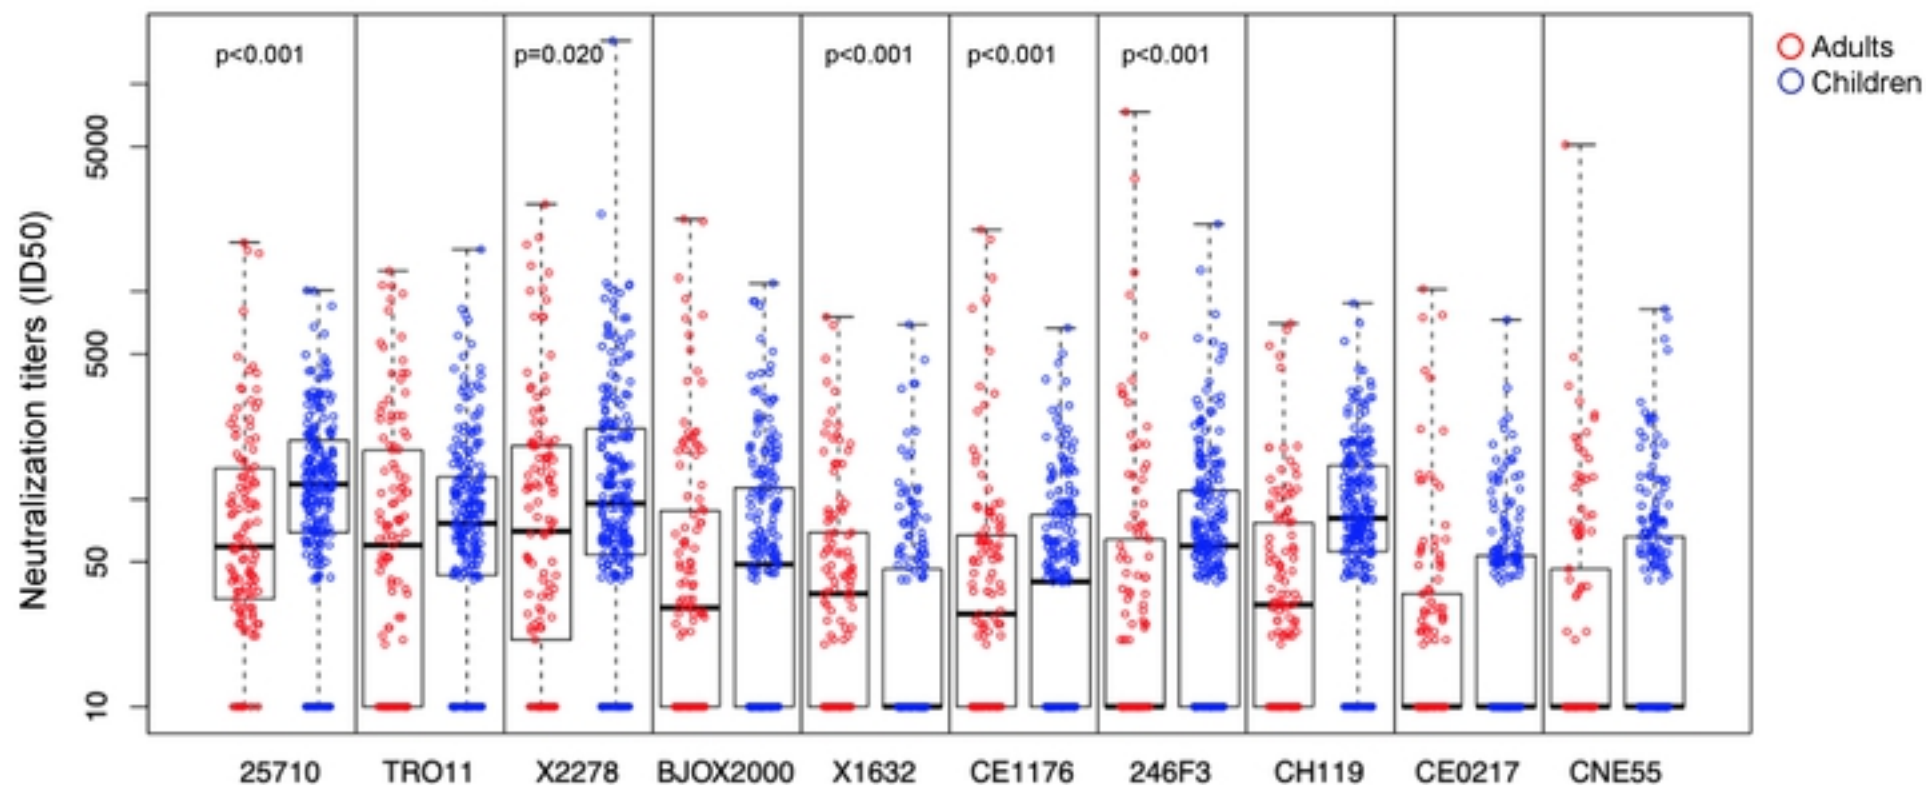

**Figure 3. Neutralization potency in adults vs. children**

The neutralization titers of the pediatric samples were calculated for each virus and compared to data from the historical adult cohort. Children demonstrated higher neutralization potency against 4/10 viruses and adults demonstrated higher neutralization potency against 1/10 viruses.

Statistical significance determined by Wilcoxon test as noted.

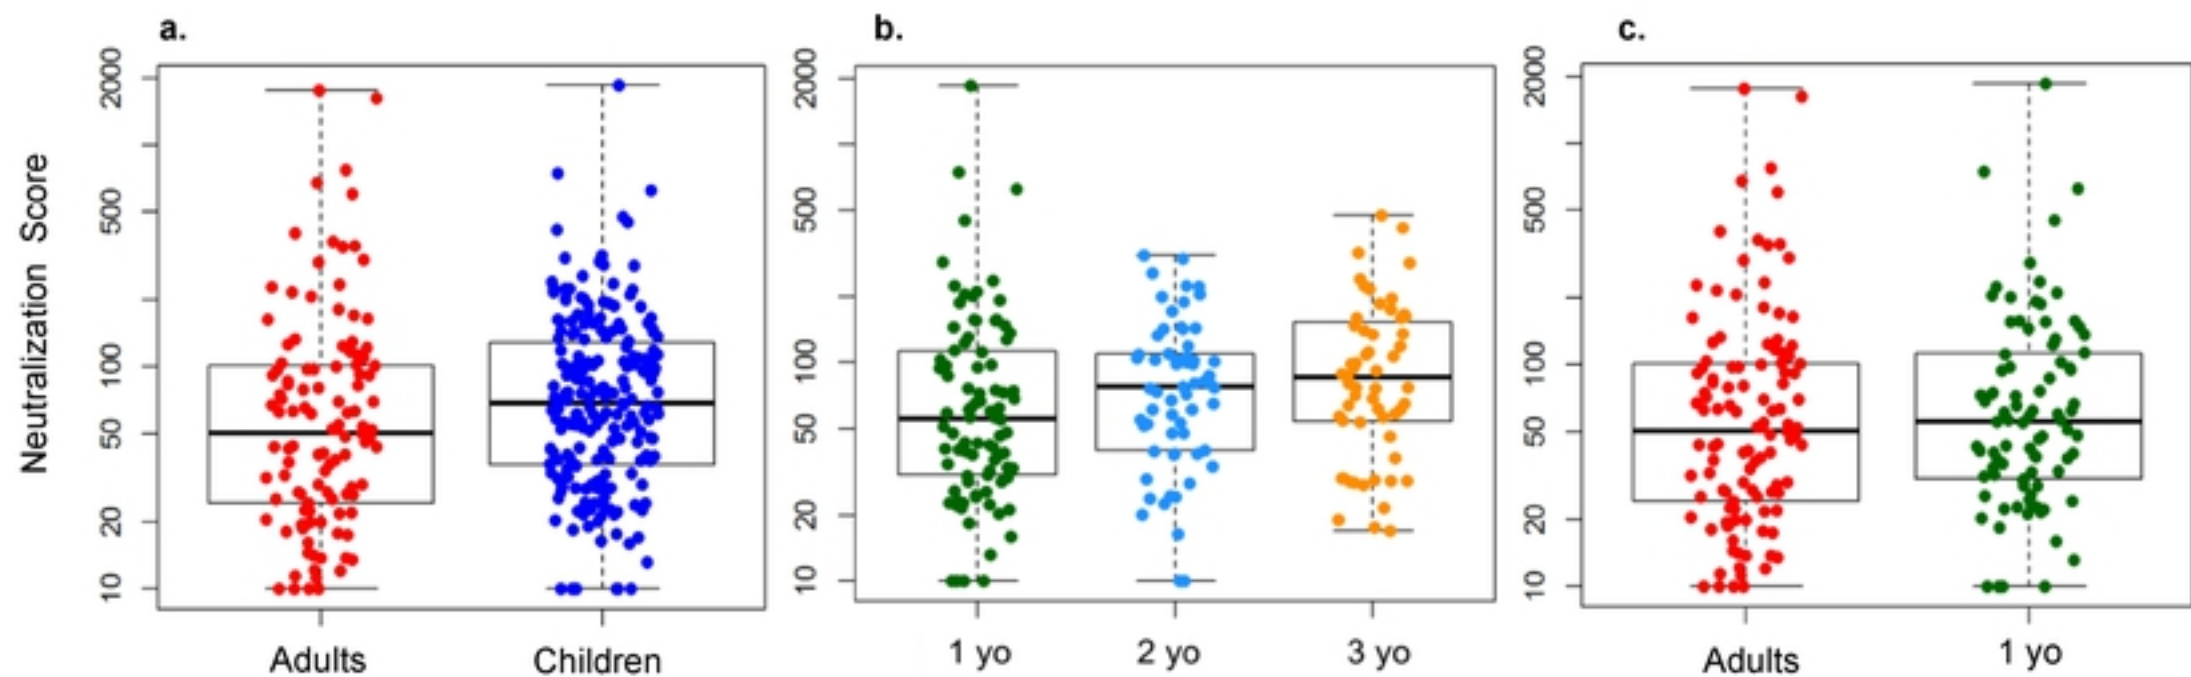

**Figure 4. Neutralization score in adults vs. children**

Neutralization score was determined as the AUC of the neutralization curve for all tested viruses (a) Overall, the neutralization score was greater in children than in chronically infected adults ( $p=0.014$ , Wilcoxon). (b) Neutralization score increased with age ( $p=0.014$ , median regression analysis) (c) The neutralization score of the 1 year-old cohort was comparable to that of adults ( $p=0.44$ , Wilcoxon).



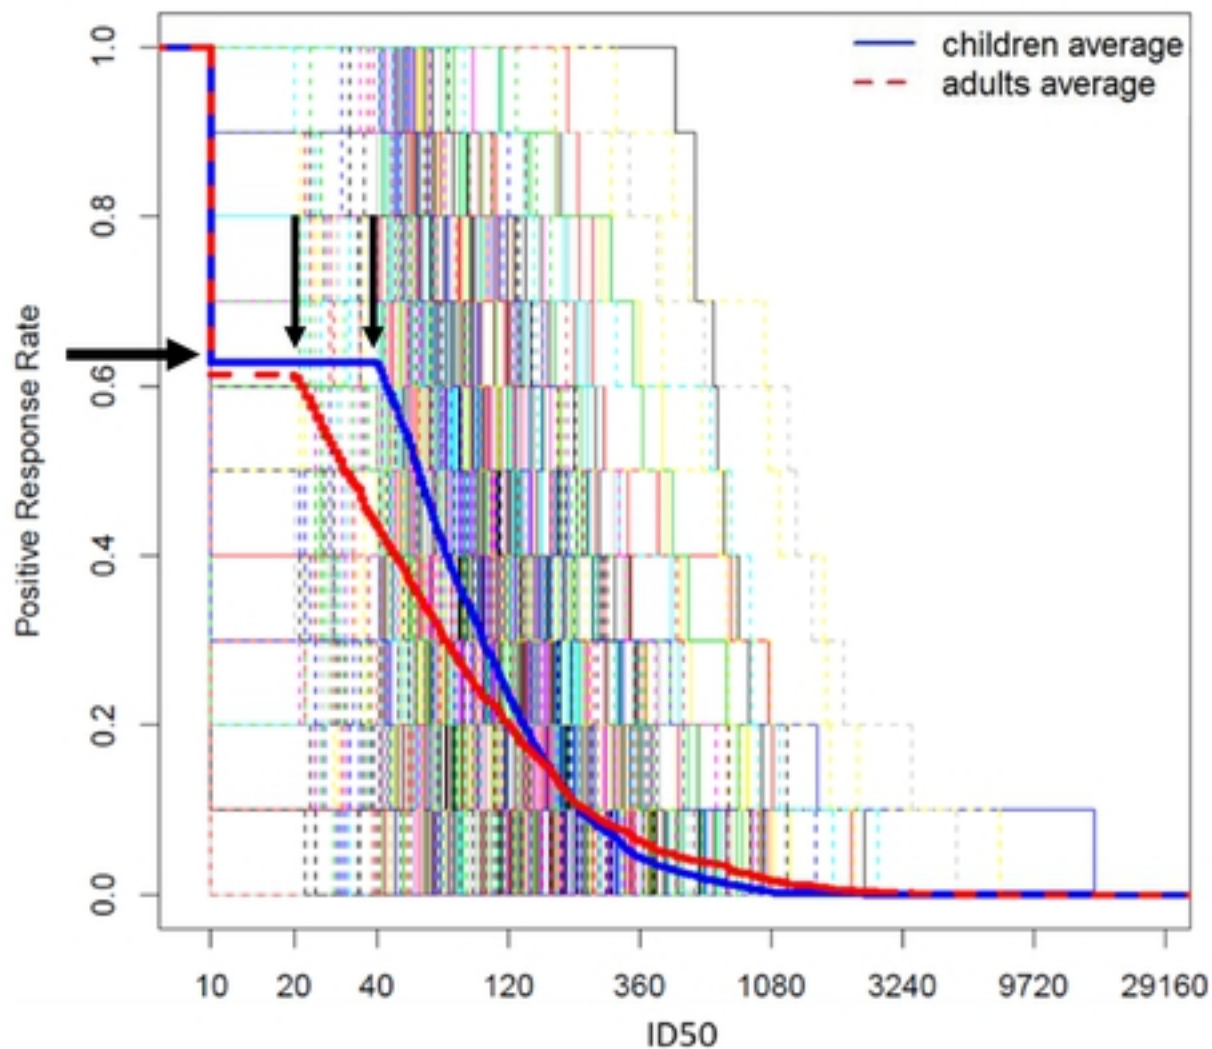

**Figure 5. Magnitude-breadth curve comparing adults vs. children**

The average ID50 value for the pediatric cohort was significantly greater than that of the adult cohort ( $p = 0.013$ , Mann Whitney U) as indicated by the vertical arrows whereas a similar proportion of viruses were neutralized in the two cohorts as indicated by the horizontal arrow.

|     |     |         | Epitope targeted by mutant |       |       |       |                |           |           |                    |                    |                     | putative epitope specificity |
|-----|-----|---------|----------------------------|-------|-------|-------|----------------|-----------|-----------|--------------------|--------------------|---------------------|------------------------------|
| PTD | Age | WT ID50 | CD4bs                      | CD4bs | CD4bs | CD4bs | 2G12 Sensitive | V3 Glycan | V2 Glycan | gp120-gp41 (35022) | gp120-gp41 (35022) | gp120-gp41 (PGT151) |                              |
|     |     |         | N279A                      | N280D | G458Y | N276Q | N295V          | N332A     | N160K     | N88A               | N625A              | N611A               |                              |
| 1   | 1   | 331     | 1550                       | 2531  | 2428  | <50   | NA             | 476       | 474       | 628                | 745                | NA                  | CD4 bs                       |
| 2   | 1   | 1268    | 2111                       | 3516  | 2108  | 754   | 1100           | 1083      | 370       | 1444               | 928                | 923                 | V2 glycan                    |
| 3   | 2   | 415     | NA                         | NA    | NA    | NA    | 171            | 80        | 362       | 322                | 338                | 328                 | V3 glycan                    |
| 4   | 3   | 471     | 1486                       | 5411  | 938   | 196   | 167            | 120       | 605       | 397                | 260                | 427                 | V3 glycan                    |
| 5   | 3   | 890     | 1571                       | 4097  | 1223  | 503   | 1954           | 115       | 1098      | 1420               | 677                | 972                 | V3 glycan                    |

c.

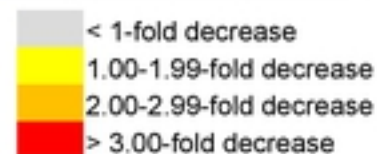

**Table 3. Epitope specificity of broadly neutralizing pediatric samples** Neutralization of mutant variants in the 5 pediatric samples that neutralized  $\geq 5$  of the 10-virus global panel with an ID50  $\geq 100$  and demonstrated at least a 3-fold reduction in ID50 against one mutant pseudovirus.



# Supplemental Figures

| Antigen               | Adults (%) | Children (%) |         |
|-----------------------|------------|--------------|---------|
| Con6 gp120/B          | 100        | 96           |         |
| MNgp120               | 100        | 92           |         |
| A244 gp120            | 86         | 70           | p=0.032 |
| B.con_env03 gp140 CFI | 100        | 100          |         |
| ConS gp140 CFI        | 100        | 100          |         |
| A1.Con gp140          | 100        | 96           |         |
| 1086C gp140           | 100        | 98           |         |
| RecMN gp41            | 100        | 100          |         |
| gp70_B.CaseA_V1V2     | 73         | 67           |         |
| gp70 MNV3             | 98         | 90           |         |
| Bio-V2.B              | 39         | 53           |         |
| Bio-V3.B              | 95         | 93           |         |
| MPER656               | 61         | 79           | p=0.017 |
| RV144 C5.2B           | 77         | 42           | p<0.001 |
| C1 Biotin             | 11         | 58           | p<0.001 |
| YU2 Core              | 98         | 92           |         |
| YU2 Core D368R        | 23         | 36           |         |

**Supplemental Table 1. Frequency of Env-specific IgG binding response in adults vs. children**  
Proportion of adult and pediatric samples with binding magnitude of MFI >100 for each antigen, as assessed by BAMA.  
Statistically significant p-values included as determined by Barnard's test.

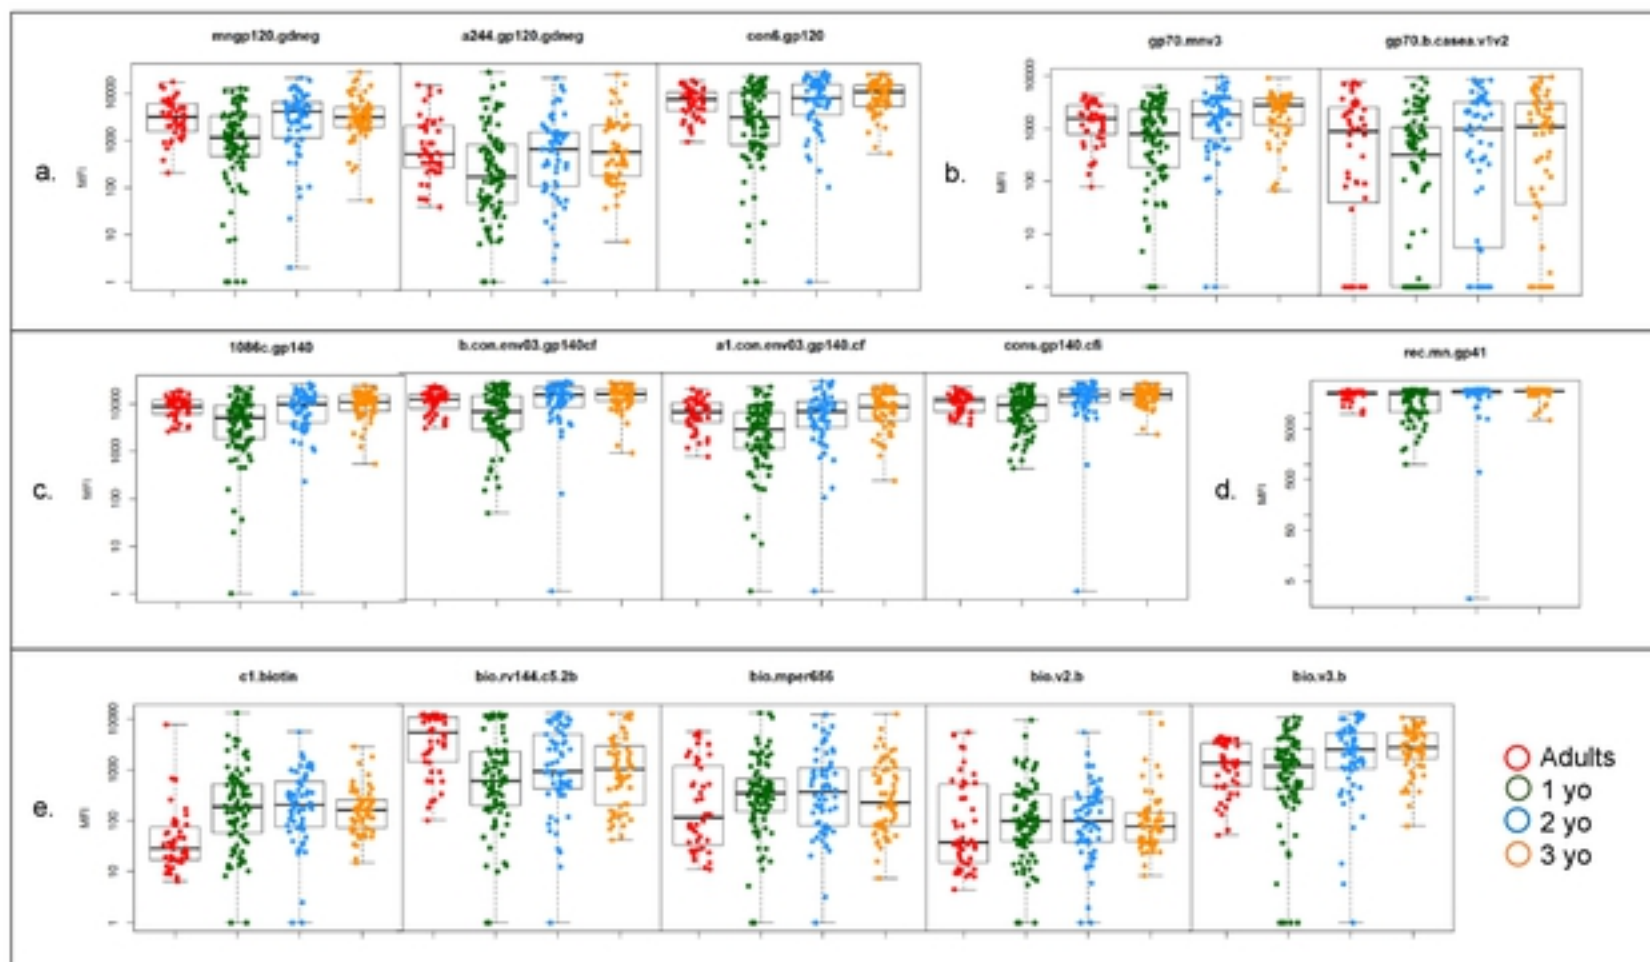

**Supplemental Figure 1. HIV-1 Env-Specific Total IgG Extended**

Total IgG for select HIV-1 Env epitopes were measured by binding antibody multiplex assay in adult and pediatric cohorts, including age 1, 2, and 3-year old sub-cohorts shown here. Epitopes include gp120 (a), variable loops (b), gp140 (c), gp41 (d) and peptides (e).

### IgG1

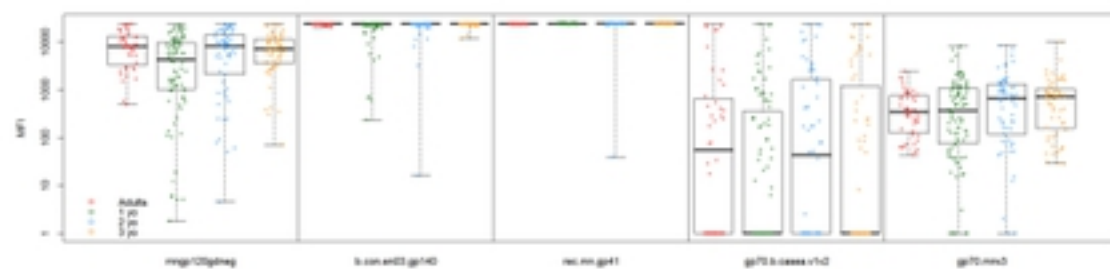

### IgG2

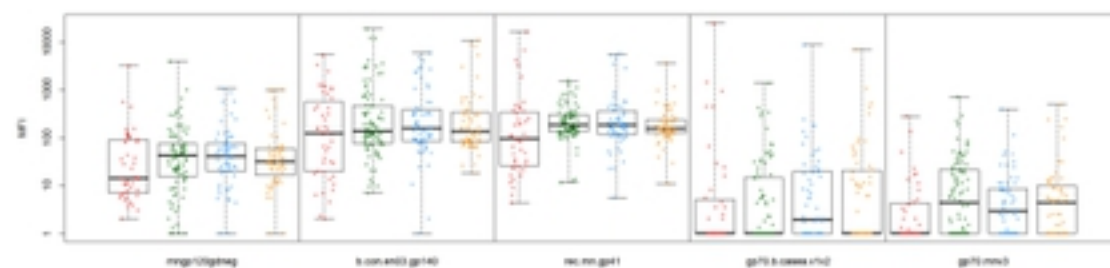

### IgG3

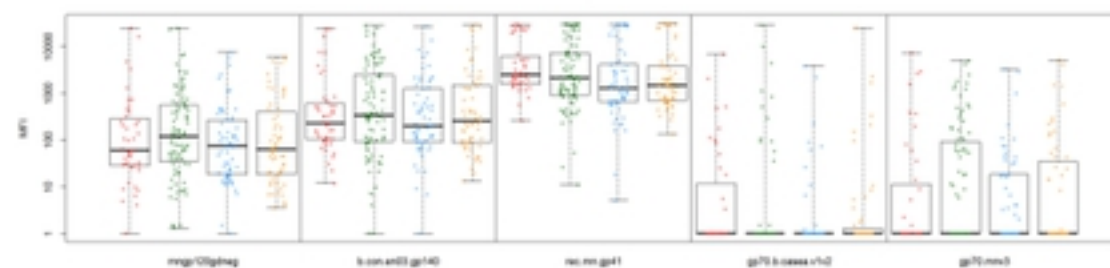

### IgG4

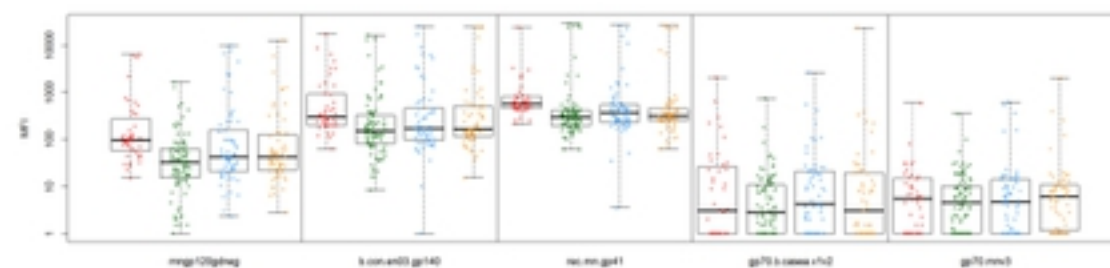

## Supplemental Figure 2. HIV-1 Env-Specific IgG Subclass Extended

Individual IgG subclasses for select HIV-1 Env epitopes were measured by binding antibody multiplex assay in adult and pediatric cohorts, including age 1, 2, and 3-year old sub-cohorts shown here.

| IgG Subclass | Antigen               | Adults (%) | Children (%) |         |
|--------------|-----------------------|------------|--------------|---------|
| IgG1         | MNgp120               | 100        | 94           |         |
|              | B.con_env03 gp140 CFI | 100        | 100          |         |
|              | RecMN gp41            | 100        | 100          |         |
|              | gp70_B.CaseA_V1V2     | 45         | 38           |         |
|              | gp70 MNV3             | 80         | 75           |         |
| IgG2         | MNgp120               | 20         | 21           |         |
|              | B.con_env03 gp140 CFI | 55         | 64           |         |
|              | RecMN gp41            | 48         | 87           | p<0.001 |
|              | gp70_B.CaseA_V1V2     | 11         | 8            |         |
|              | gp70 MNV3             | 5          | 5            |         |
| IgG3         | MNgp120               | 43         | 46           |         |
|              | B.con_env03 gp140 CFI | 77         | 71           |         |
|              | RecMN gp41            | 100        | 98           |         |
|              | gp70_B.CaseA_V1V2     | 16         | 8            |         |
|              | gp70 MNV3             | 16         | 19           |         |
| IgG4         | MNgp120               | 48         | 22           | p=0.002 |
|              | B.con_env03 gp140 CFI | 98         | 73           | p=0.002 |
|              | RecMN gp41            | 100        | 96           |         |
|              | gp70_B.CaseA_V1V2     | 14         | 7            |         |
|              | gp70 MNV3             | 2          | 5            |         |

**Supplemental Table 2. Frequency of Env-specific IgG subclass binding response in adults vs. children**  
Proportion of adult and pediatric samples with binding magnitude of MFI >100 for each antigen, as assessed by BAMA. Statistically significant p-values included as determined by Barnard's test.

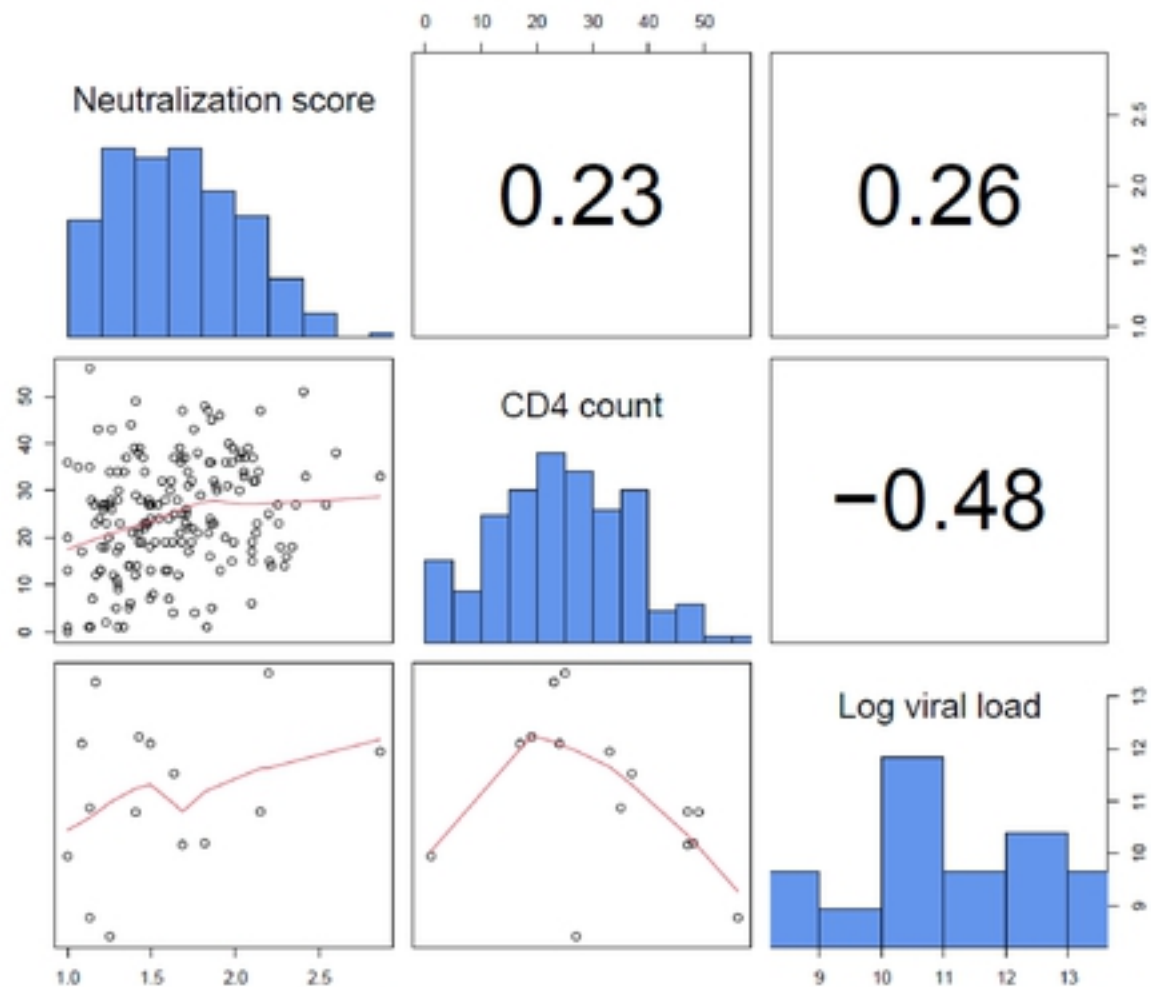

| CD4 % ~ Neutralization score    | CD4 count ~ Neutralization score | VL ~ Neutralization score     |
|---------------------------------|----------------------------------|-------------------------------|
| 0.01 (CI=0.000, 0.001, p=0.002) | 0.07 (CI=0.02, 0.11, p=0.003)    | 0.10 (CI=-0.10, 0.31, p=0.28) |

**Supplemental Figure 4. Association between neutralization breadth score and clinical factors for pediatric cohort.** Estimated slopes and p-values from linear regression are shown below.

**Supplemental Table 3: association between binding and neutralizing antibody responses**

|                     | Spearman correlation with<br>neutralization score | P value      | Holm adjusted p<br>value |
|---------------------|---------------------------------------------------|--------------|--------------------------|
| IgG MN gp120        | 0.205                                             | <b>0.003</b> | <b>0.039</b>             |
| IgG1 MN gp120       | 0.181                                             | <b>0.008</b> | 0.101                    |
| IgG2 MN gp120       | 0.141                                             | <b>0.041</b> | 0.407                    |
| IgG3 MN gp120       | -0.048                                            | 0.490        | 1.000                    |
| IgG4 MN gp120       | 0.187                                             | <b>0.006</b> | 0.082                    |
| IgG B con gp140     | 0.261                                             | <b>0.000</b> | <b>0.002</b>             |
| IgG1 B con<br>gp140 | 0.147                                             | <b>0.032</b> | 0.354                    |
| IgG2 B con<br>gp140 | 0.085                                             | 0.215        | 1.000                    |
| IgG3 B con<br>gp140 | 0.010                                             | 0.889        | 1.000                    |
| IgG4 B con<br>gp140 | 0.208                                             | <b>0.002</b> | <b>0.034</b>             |
| IgG gp41            | 0.136                                             | <b>0.049</b> | 0.437                    |
| IgG1 gp41           | 0.100                                             | 0.148        | 1.000                    |
| IgG2 gp41           | 0.068                                             | 0.322        | 1.000                    |
| IgG3 gp41           | 0.024                                             | 0.728        | 1.000                    |
| IgG4 gp41           | 0.249                                             | <b>0.000</b> | <b>0.004</b>             |
| IgG C1              | 0.055                                             | 0.436        | 1.000                    |
| IgG C5              | 0.054                                             | 0.433        | 1.000                    |

| Parent Virus   | TRO11        | 25710-2.43       | BJOX002000.03.2       | Epitope Specificity  |
|----------------|--------------|------------------|-----------------------|----------------------|
| <b>Mutants</b> | TRO.11.N279A | 25710-2.43.N279A |                       | CD4bs                |
|                | TRO.11.N280D | 25710-2.43.N280D |                       |                      |
|                | TRO.11.G458Y | 25710-2.43.G458Y |                       |                      |
|                | TRO.11.N276Q | 25710-2.43.N276Q |                       |                      |
|                | TRO.11.S365P |                  |                       |                      |
|                | TRO.11.N295V |                  | BJOX002000.03.2.L295N | 2G12                 |
|                | TRO.11.N332A | 25710-2.43.N332A | BJOX002000.03.2.N332A | V3 Glycan            |
|                | TRO.11.N160K | 25710-2.43.N160K | BJOX002000.03.2.N160K | V2 Glycan            |
|                | TRO.11.N88A  | 25710-2.43.N88A  | BJOX002000.03.2.N88A  | gp120-gp41 Interface |
|                | TRO.11.N625A | 25710-2.43.N625A | BJOX002000.03.2.N625A |                      |
|                | TRO.11N611A  | 25710-2.43.N611A | BJOX002000.03.2.N611A |                      |

**Supplemental Table 4. Mutant pseudovirus panels for epitope mapping**



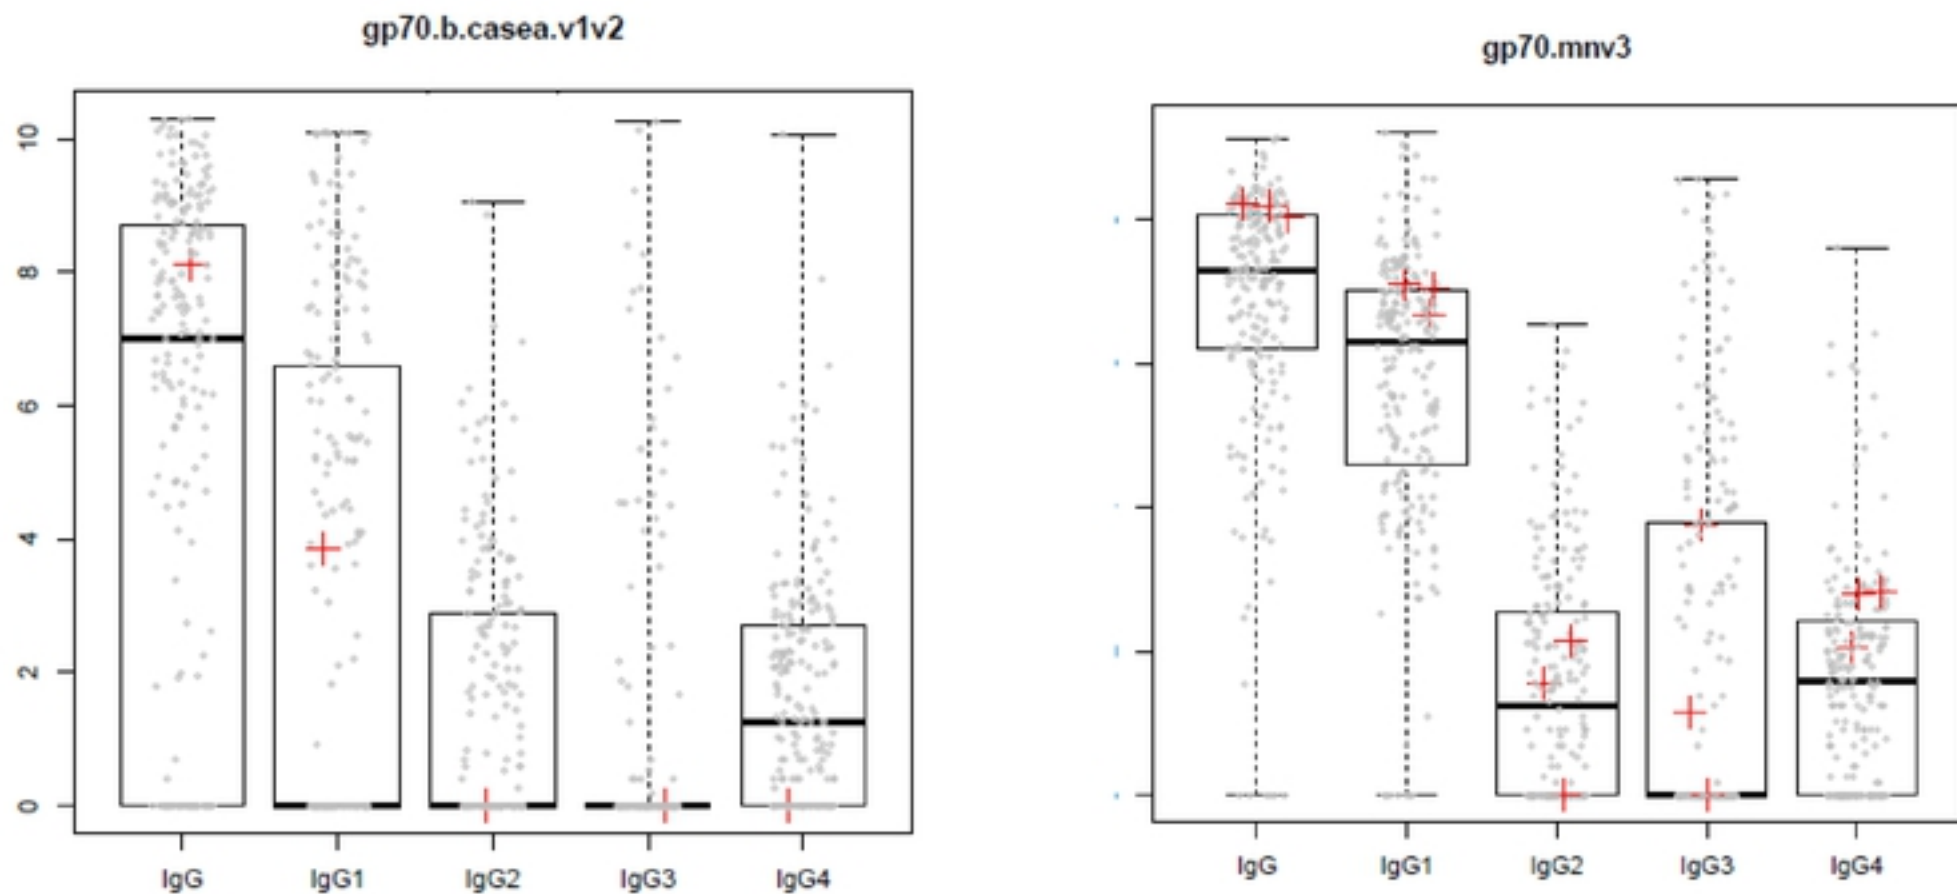

**Supplemental Figure 5: Association between binding and neutralization epitope specificity.** Distribution of the V1V2-specific (A) and of V3-specific (B) binding responses in the pediatric cohort. The PTDS in whom neutralization specificity mapped to V2 glycan (PTD 1, panel A) or to V3 glycan (PTD 2, 4 and 5, panel B) is indicated with the red cross. Overall, PTD ranks above the 50% percentile for V1V2 specific IgG and IgG1 but not for the other IgG subclasses. PTD 2, 4, and 5 ranked above the 50% percentile for V3-specific IgG, IgG1 and IgG4.
